## RESEARCH ARTICLE

## Hydroxychloroquine reduces T cells activation recall antigen responses

Monika M. Kowatsch<sup>1</sup>\*, Julie Lajoie<sup>1,2</sup>\*, Lucy Mwangi<sup>2</sup>, Kenneth Omollo<sup>2</sup>, Julius Oyugi<sup>1,3,4</sup>, Natasha Hollett<sup>1</sup>, Joshua Kimani<sup>1,3,4</sup>, Keith R. Fowke<sup>1,2,3,5</sup>\*

**1** Laboratory of Viral Immunology, Department of Medical Microbiology and Infectious Diseases, University of Manitoba, Winnipeg, Manitoba, Canada, **2** Department of Medical Microbiology, University of Nairobi, Nairobi, Kenya, **3** Partners for Health and Development in Africa, Nairobi, Kenya, **4** University of Nairobi Institute for Tropical and Infectious Diseases, University of Nairobi, Nairobi, Kenya, **5** Department of Community Health Science, University of Manitoba, Winnipeg, Manitoba, Canada

\* These authors contributed equally to this work.

\* [Keith.Fowke@umanitoba.ca](mailto:Keith.Fowke@umanitoba.ca)

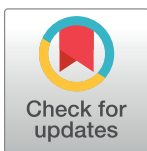

## Abstract

## Background

In the context of the current COVID-19 pandemic, there is still limited information about how people suffering from autoimmune diseases respond to the different COVID vaccines. The fact that they are taking an immunosuppressant or other drugs that aim to decrease the immune system activities, such as hydroxychloroquine (HCQ), could also impact their ability to respond to a COVID vaccine and vaccines in general.

## Methods

Healthy donors were given 200mg of HCQ daily for 6-weeks to assess HCQs impact on the systemic T cells and humoral immune response. Peripheral blood mononuclear cells (PBMC) and plasma were obtained at baseline and 6-weeks after starting daily HCQ. Flow cytometry assays were designed to determine changes in T cell activation and T cell responses. Bead array multiplex were used to analyse antibodies and cytokine levels before and after HCQ intake.

## Results

As anticipated, HCQ treatment decreased *ex vivo* T cell activation. We observed a decrease in CD4<sup>+</sup>CD161<sup>-</sup> expressing CCR5 (p = 0.015) and CD69 (p = 0.004) as well as in CD8<sup>+</sup>CCR5<sup>+</sup> (p = 0.003), CD8<sup>+</sup>CD161<sup>+</sup>CCR5<sup>+</sup> (p = 0.002) and CD8<sup>+</sup>CD161<sup>+</sup>CD95<sup>+</sup> (p = 0.004). Additionally, HCQ decreased the proportion of Th17 expressing CD29 (p = 0.019), a subset associated with persistent inflammation. The proportion of T regulatory cells expressing the inhibitory molecule TIGIT was also reduced by HCQ (p = 0.003). As well, T cells from people on HCQ were less responsive to activation and cytokine production following stimulation with recall antigens and memory T cells were less likely to produce both IFN $\gamma$  and TNF $\alpha$  following stimulation.

## OPEN ACCESS

**Citation:** Kowatsch MM, Lajoie J, Mwangi L, Omollo K, Oyugi J, Hollett N, et al. (2023) Hydroxychloroquine reduces T cells activation recall antigen responses. PLoS ONE 18(8): e0287738. <https://doi.org/10.1371/journal.pone.0287738>

**Editor:** Janin Nouhin, Institut Pasteur Cambodia, Institut Pasteur du Cambodge, CAMBODIA

**Received:** December 7, 2022

**Accepted:** June 4, 2023

**Published:** August 2, 2023

**Peer Review History:** PLOS recognizes the benefits of transparency in the peer review process; therefore, we enable the publication of all of the content of peer review and author responses alongside final, published articles. The editorial history of this article is available here: <https://doi.org/10.1371/journal.pone.0287738>

**Copyright:** © 2023 Kowatsch et al. This is an open access article distributed under the terms of the [Creative Commons Attribution License](https://creativecommons.org/licenses/by/4.0/), which permits unrestricted use, distribution, and reproduction in any medium, provided the original author and source are credited.

**Data Availability Statement:** The data used for this article can be found at <https://doi.org/10.34990/FK2ZZQ1QD>.

**Funding:** KRF (OCH # 126275) from Canadian Institutes of Health Research (<https://cihr-irsc.gc.ca/e/193.html>). The funders had no role in study design, data collection and analysis, decision to publish, or preparation of the manuscript. J.L. (S5 386-01) from Grand Challenges Canada (<https://www.grandchallenges.ca/>). The funders had no role in study design, data collection and analysis, decision to publish, or preparation of the manuscript.

**Competing interests:** The authors have declared that no competing interests exist.

## Conclusion

This study shows HCQ is associated with lower T cell activation and decreased T cell cytokine production. While this study was not performed with the intent of looking at COVID vaccine response, it does provide important information about the changes in immune response that may occur in patient taking HCQ as a treatment for their autoimmune disease.

## Introduction

In March 2020, the World Health Organization (WHO) declared that the SARS-CoV-2 had become a pandemic. Currently, it has infected over 767 million people worldwide and killed more than 6 million people (WHO update). While COVID-19 infection can be asymptomatic or give mild symptoms, it can also lead to severe disease, hospitalization, and death (WHO). Despite being vaccinated against COVID-19, some individuals remain at higher risk of severe infections.

Pre-existing conditions such as HIV [1], chronic lung disease [2], heart conditions [3] or immunocompromised individuals [4] are at a higher risk of developing severe disease if they are infected by SARS-CoV-2. Studies have shown that people living with an immune-mediated inflammatory diseases (IMID), such as rheumatoid arthritis, systemic lupus erythematosus, or inflammatory bowel disease, can mount a good humoral response (according to the antibody level measured) after 2 doses of mRNA vaccine. However, a proportion of these individuals show a lower antibody response post vaccination compared to healthy adults [5] and a recent study showed that in people living with IMID, the waning of antibodies and T cell responses happen faster than in healthy controls [6]. Interestingly, in this study, the importance of the decline (antibody level and neutralization capacity) was associated with autoimmune disorder treatment [6]. Indeed, no SARS-CoV-2-specific immune response could be detected as early as 3 months post second dose in anti-tumor necrosis factor (TNF) treated patients, highlighting the importance of considering medication used in the policies to access extra vaccine doses [6].

Due to its effects in blocking inflammation, hydroxychloroquine (HCQ) is used to manage the symptoms of excessive immune activation observed in autoimmune diseases such as rheumatoid arthritis, Sjögrens syndrome, systemic lupus erythramatosus [7] and phospholipid antibody syndrome [8]. Its use has been largely discussed recently in the context of treatment [9–11] or pre-exposure prophylaxis against COVID-19 [12], where it was shown to be ineffective. However, little has been reported on how the use of HCQ as an immunomodulator in IMID patients could impact their broader immune response.

We conducted a HIV prevention proof-of-concept study to determine whether HCQ's anti-inflammatory activity would reduce levels of vaginal mucosa activated CD4<sup>+</sup>CCR5<sup>+</sup> T lymphocytes, as these cells are the primary target cell for HIV infection. Detailed immune assessments of the female genital tract and blood were performed. While the impact of HCQ treatment on reducing mucosal CD4<sup>+</sup>CCR5<sup>+</sup> lymphocyte levels was not as promising as the other drug investigated (acetylsalicylic acid-aspirin) [13], HCQ treatment was associated with several significant dampening effects in the systemic immune system that we are reported herein.

## Materials and methods

### Participants and study design

The Immune Quiescence (IIQ) study was a randomized, open-label pilot study conducted at the Pumwani Maternity and Baba Dogo community clinics in Nairobi, Kenya, in 2014 which

involved the recruitment of 104 HIV uninfected women. This study had two arms; 81 mg of ASA or 200 mg of HCQ taken daily for a six-week period. The main findings of the study have been published previously [13]. Data presented herein reflect the effect of HCQ treatment on the systemic immune system, which was not reported previously. Briefly, the inclusion criteria included: women aged between 18 and 55 years, presence of a uterus and cervix, willingness to take the study drug for 6-weeks, general good health, not taking any anti-inflammatory or immunosuppressive drugs, HIV seronegative, and having no history of cardiovascular diseases. Exclusion criteria included: having been pregnant in the last 12 months or breastfeeding, presence of a sexual transmissible disease (STI) at any time point during the study, menopause, taking medication that counteracts the study drugs, known allergy to the study drugs, history of heart burn, stomach pain, stomach ulcers, anemia, hemophilia, kidney or liver disease, psoriasis, glucose-6-phosphate-dehydrogenase deficiency, dermatitis, alcoholism, eye disease/sight impairment, or being involved in another clinical trial. Ethics boards from the University of Nairobi/Kenyatta National Hospital and the University of Manitoba approved the study. Written informed consent was obtained from all participants.

### Enrolment and clinical procedures

Participants who met enrolment criteria and had normal liver and kidney function (creatinine, urea, sodium, potassium, aspartate amino transferase, alanine amino transferase, gamma-glutamyl transferase, alkaline phosphotransferase) were enrolled and randomized into one of the two study arms. Participant baselines were assessed at the first visit (BL), with samples collected prior to the initiation of the study drug, which they then took daily for six weeks. Participants returned to the clinic two weeks (Wk2) and six weeks (Wk6) later. At each study visit, blood, cervico-vaginal lavage (CVL), and endocervical cytobrush were taken and a questionnaire was filled out. Following the week 6 visit when the drug was stopped, a follow-up was scheduled 2 to 4 weeks later to reassess kidney and liver functions. In order to assess pill-taking adherence, participants were asked to return the pill container and a pill count was performed at each visit. Plasma and CVL were shipped to Winnipeg, Canada for drug-level measurement.

Clinical, demographic, and behavioural questionnaires were answered at every visit along with vaginal and blood samples. At each visit, a vulvovaginal swab was collected and used to assess the presence of *Candida pseudohyphae* and bacterial vaginosis by microscopy. *Trichomonas vaginalis* was diagnosed using the In-Pouch kit (Biomed Diagnostics, USA). Urine samples were collected for PCR detection of *Neisseria gonorrhoea* and *Chlamydia trachomatis* (Roche Amplicor kits, USA). HIV serology using a rapid test (Determine, Inverness Medical, Japan) was performed at the first and last study visit. Women with a menstrual cycle were asked to come 5–8 days after bleeding stopped ensuring mucosal samples were taken during the follicular phase. Participant baseline (visit 1, BL) was used to assess systemic and mucosal immune activation prior to the initiation of drug therapy, making each participant their own control.

### Sample collection and processing

Blood was collected by venipuncture using heparin tubes. Peripheral blood mononuclear cells (PBMC) were isolated by Ficoll density gradient. T cell activation PBMCs was determined using flow cytometry in Nairobi, Kenya. Remaining PBMCs were frozen and shipped to Winnipeg, Canada, where stimulations and further characterization of the immune system took place.

## Drug level detection

HCQ levels in plasma were quantitated using reversed phase high-performance liquid chromatography (RP-HPLC) following a previously described method [14]. Drug contents in the samples were extracted and analyzed using the Symmetry<sup>®</sup> C18 column attached to a Waters<sup>®</sup> Alliance<sup>®</sup> HPLC system equipped with Waters<sup>®</sup> 2690 Separations module and Waters<sup>®</sup> 996 Photodiode Array detector. Chloroquine was used as an internal standard.

## IgG detection

Total IgG levels were determined using a Human IgG Subclass Profile kit (Invitrogen, Carlsbad, USA). Samples were run according to manufacturer's protocol at a dilution of 1:3000. Influenza specific IgG levels were assessed using an in-house bead array which has been previously described [15]. Briefly, antigens from 10 different influenza strains (H1N1 Soloman, H1N1 Puerto Rico, H3N2 Brisbane, H3N2 Hong Kong, H3N2 Kiev, H3N2 Wisconsin, H7N7 Netherlands, B Malaysia, B Quingdao, B Victoria) (Prospec, East Brunswick, New Jersey, USA) were selected. Antigens were bound to uniquely labelled fluorescent beads. Samples were run at a dilution of 1:100. Following incubation, beads were washed to remove unbound sample and exposed to biotinylated mouse anti-human IgG1. Influenza specific IgG was quantitated using streptavidin-PE and acquired on the Bioplex 200 suspension array system (BioRad, Mississauga, Ontario, Canada).

## Flow cytometry

Assays performed in Nairobi, Kenya were done on fresh cells. PBMC ( $10^6$ ) and CMC (whole pellet) were washed with PBS containing 2% v/v FBS (FACS) and stained with the following antibodies: PE.Cy5-CD3, FITC-CD4, V500-CD8, PE-CD95, APC.H7-HLA-DR, APC-CD161, Alexa700-CD45RA, V450-CCR5, PE.Cy7-CD69, PE-CF594-CCR7 (BD Biosciences, USA), and Far Red-Live Dead discriminant (Invitrogen, USA). Data were acquired on an LSRII flow cytometer (BD System, USA) and analyzed using FlowJo v10.0.8r1 (BD Biosciences, San Jose, USA).

For frozen PBMCs, four separate flow cytometry assays were performed. The first panel was designed to assess T cell subsets and markers of cell trafficking. For this assay, cells were thawed and rested overnight,  $10^6$  PBMCs were washed with 2% FBS-1x PBS and stained with APC-Fire-CD3, BV605-CD4, BV650-CD8, BV421-CD161, Alexa700-CD29, PE-Dazzle-CXCR3, PerCP-Cy5.5-V $\alpha$ 7.2 (BD Biosciences, USA), PE-CD103, PE-Cy7-CD25, BB515-CCR5, APC-CCR6 (Biolegend, San Diego, USA), and Aqua Vivid Dead discriminant (ThermoFisher, Waltham, USA). The second panel was designed to characterize T regulatory cells (Tregs). As before, cells were thawed and rested overnight, then  $10^6$  PBMCs were washed with FACS and stained following a modified intracellular (nuclear antigen) protocol from ThermoFisher Scientific [16]. Antibodies used were as follows, PECy7-CD3, BV605-CD4, BV650-CD8, Alexa488-CD25, Alexa700-CD127, PE-Dazzle-TIGIT, APC-Fire-CD69, BV711-HLA-DR, PerCP-Cy5.5-CTLA-4 (Biolegend, San Diego, USA), PE-FoxP3, eFlour450--Helios (eBiosciences, Santa Clara, USA), and Aqua Vivid Dead discriminant (ThermoFisher, Waltham, USA).

Stimulations were performed on cryopreserved cells and two types of stimulations assays were performed, short term 12-hours and long-term 7 days. (1) CD3/CD28 beads (Life-Technologies, USA) were used as a positive control (at a ratio of Beads:PBMCs of 1:1 for the 12-hour stimulation and 1:2 for the 7-day stimulation). (2) Two peptide pools were used for stimulation; Cytomegalovirus, Epstein Barr virus, Influenza—Flu (CEF) peptide pool (Cellular Technology Ltd, USA) at a concentration of 2 $\mu$ g/mL and a human papilloma virus (HPV)

peptide pool at a concentration of 8 $\mu$ g/mL that was designed based on an immune epitope mapping study using the E2 protein [17]. Ten immunodominant peptides were chosen and sent to ThermoFisher for custom peptide synthesis (ThermoFisher, USA), and mapped to the E2 protein of HPV16 as follows: E2-1 amino acids 30–44, E2-2 amino acids 94–108, E2-3 amino acids 99–114, E2-4 amino acids 136–150, E2-5 amino acids 143–157, E2-6 amino acids 150–164, E2-7 amino acids 286–301, E2-8 amino acids 301–315, E2-9 amino acids 309–323, E2-10 amino acids 335–350. PBMCs were thawed and rested overnight followed by stimulation for either 12 hours with Golgi Stop and Golgi Plug (BD Biosciences, USA) or pre-stained with CSFE (LifeTechnologies, USA) and stimulated for 7 days with feeding on day 5. All stimulations were conducted in RPMI+2% v/v inactivated human AB serum + 2% v/v Penicillin-Streptomycin (Sigma-Aldrich, USA). Following stimulation, cells were stained with BV711-CD3, BV605-CD4, BV650-CD8, APC-Fire-CD69, PECy7-CD95, PECy5-CD45RA, BV510-CCR7. Cells undergoing 12-hour stimulation were stained with PE-IL-2, BV421-IFN $\gamma$ , Alexa488-TNF $\alpha$ , following intracellular permeabilization for cytokines according to manufacturer's protocol [16]. Cells undergoing 7-day stimulation were stained with APC-HLA-DR in addition to the phenotyping markers described above. For all four assays run in Winnipeg, Canada, data was acquired on an LSRII flow cytometer (BD System, USA) and analyzed using FlowJo v10.6.1 (BD Biosciences, USA).

## Statistical methods

**Systemic T cell immune activation:** The analyses performed for this pilot study included assessment of the difference in T cell immune activation between baseline and each visit separately. In the analysis, the  $X^2$  test was used to assess the significance of the associations between categorical variables using Prism 6.0f (GraphPad Software, La Jolla, CA, USA). Gaussian distribution was tested by Shapiro-Wilk normality test and normality plot using SPSS (NY, USA). To compare baseline to the study visits, two-tailed paired T test or Wilcoxon matched-pair signed-rank test were performed. As this was a discovery study, p values were considered significant if  $\leq 0.05$ . The study was monitored by a Data and Safety Monitoring Board derived from University of Manitoba. The study is registered on ClinicalTrials.gov (NCT02079077). Participants who were discontinued from the study were excluded from the analysis.

**Cell trafficking, Treg and stimulation analyses:** Data was cleaned using RStudio v3.5.0 (RStudio Inc, USA) and differences in the immune system before and after HCQ were compared using Wilcoxon match pair signed rank test in STATA v15.0 (StataCorp LLC, USA). Data was visualized using Prism v8.4.1 (GraphPad Software, La Jolla, CA, USA). As this was a discovery study intention to treat analysis was performed, p values  $< 0.05$  were considered significant.

## Results

### Sociodemographics

Thirty-nine women were randomized into the HCQ arm. The average age was 30 years old. At baseline, 32 declared having a regular partner with a mean of sexual intercourse of 1.2 times in the last 7 days, all participants were enrolled in 2014. There was no difference between the number of regular partners, number of sex acts or condoms used between the study visits. The majority of women in this study were either on the injectable progestin-based contraception (depot medroxyprogesterone acetate—DMPA) (48%) or were not taking any hormonal contraception (41%). The type of contraception used was consistent during the course of the study. None of the participants on DMPA received their DMPA injection during the course of the study. [Table 1](#) represents the data collected at baseline (BL).

**Table 1. Demographic factors reported at baseline and drug levels detected at baseline and week 6.**

|                                                                                          | HCQ (n = 39)   |
|------------------------------------------------------------------------------------------|----------------|
| Age, years (mean $\pm$ SD)                                                               | 30 $\pm$ 6     |
| Regular sex partner                                                                      |                |
| Yes                                                                                      | 32 (82%)       |
| no                                                                                       | 5 (12.8%)      |
| not disclosed                                                                            | 2 (5.1%)       |
| Number of sexual intercourse with regular partner during the last 7 days (mean $\pm$ SD) | 1.26 $\pm$ 1.4 |
| Number of participants who used condom with regular partner during the last 7 days       | 5 (12.8%)      |
| Hormonal contraception used: (n (%))                                                     |                |
| None                                                                                     | 16 (41.03%)    |
| Injectable progesterone based (DMPA)                                                     | 19 (48.72%)    |
| Oral pill                                                                                | 3 (7.69%)      |
| Other or not disclose                                                                    | 1 (2.56%)      |
| Plasma Drug level at baseline (mean $\pm$ SD) <sup>a</sup>                               | Undetectable   |
| Plasma drug level at week 6 (mean $\pm$ SD) <sup>a</sup>                                 | 37.1 $\pm$ 18  |

n: number, SD: standard deviation

<sup>a</sup>limit of detection for HPLC based drug detection was 12ng/mL

<https://doi.org/10.1371/journal.pone.0287738.t001>

## Antibody production

The capacity of the humoral response to produce antibodies is an important factor when generating a response to an infection or a vaccine. To determine the impact of HCQ on the systemic humoral immune response, total IgG and influenza-specific IgG levels were assessed over the 6-weeks of HCQ treatment. We observed that the level of plasma IgG significantly decreased over 6-weeks of HCQ treatment [median V1: 15136, median V3: 13378, ( $p = 0.006$ ) (Fig 1A)]. However, there was no decrease in the level of influenza-specific IgG to seven influenza A and three influenza B isolates (Fig 1B).

## Ex vivo T cell phenotypes

T cells are an important cell of the adaptive immune system and their role is crucial for clearing viral infections [18]. It is therefore important to understand how HCQ impacts the T cell phenotype profile. We assessed the *ex vivo* profile of the T cell population in term of activation and trafficking markers to determine if HCQ treatment affects T cell activation and their capacity to migrate into the tissues. CD4<sup>+</sup> and CD8<sup>+</sup> T cell activation status was assessed on fresh cells, while Treg and expression of trafficking markers (CD25, CD29, and CCR6) on T cells were measured on cryopreserved cells.

Following 6-weeks on HCQ, the proportion of CD4<sup>+</sup>CD161<sup>+</sup>CCR5<sup>+</sup> (Th17-like cells) was lower compared to baseline [median BL: 26.05, median Wk 6: 13.2,  $p = 0.010$ ]. The proportion of CD4<sup>+</sup>CD161<sup>-</sup> expressing CCR5<sup>+</sup> [median BL: 17.85, median Wk 6: 8.82,  $p = 0.015$ ] and CD69<sup>+</sup> [median BL: 7.44, median Wk 6: 4.28,  $p = 0.004$ ] (Fig 2A) also decreased.

HCQ treatment also affected CD8<sup>+</sup> T cell activation. We observed that the percentage of CD8<sup>+</sup> CCR5<sup>+</sup> T cells decreased following HCQ treatment [median BL: 24.4, median Wk 6: 15.1,  $p = 0.003$ ]. Furthermore, the proportion of CD8<sup>+</sup>CD161<sup>+</sup>CCR5<sup>+</sup> [median BL: 38.5, median Wk 6, 21.6,  $p = 0.002$ ] and CD8<sup>+</sup>CD161<sup>+</sup>CD95<sup>+</sup> [median BL: 88.6, median Wk 6: 84,  $p = 0.004$ ] significantly decreased compared to the percentage measured at baseline (Fig 2B).

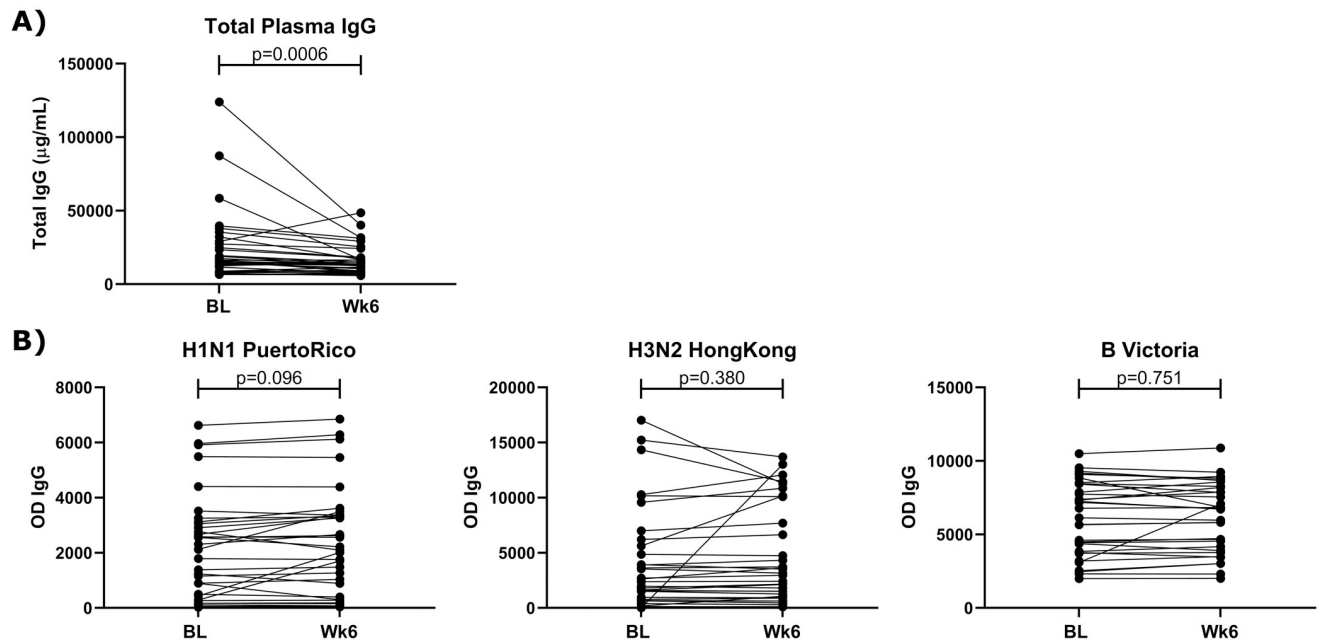

**Fig 1.** A pair-wise comparison of the quantity of total IgG in the plasma at baseline (BL) and following for 6-weeks (Wk 6) of HCQ treatment. A) Total IgG, B) select influenza specific isolates. Data was analyzed using Wilcoxon paired rank test and p values <0.05 were considered significant.

<https://doi.org/10.1371/journal.pone.0287738.g001>

To further describe T cell populations, frozen PBMC were analyzed. An increase in the proportion of CD4<sup>+</sup> T cells [median V1: 37.8, median V3: 43.8,  $p = 0.047$ ] as well as in the expression of CD4 on a per cell basis (Median Fluorescence Intensity—MFI) [median V1: 8090, median V3: 8516,  $p = 0.034$ ] (Fig 2C) was observed. This is consistent with the data reported in Lajoie *et al.*, performed *ex vivo* on fresh PBMC [13].

In addition, following 6-weeks of HCQ treatment, Tregs (defined as CD4<sup>+</sup>CD25<sup>+</sup>FoxP3<sup>+</sup>) expressing T cell Immunoglobulin and ITIM Domain (TIGIT) were lower compared to the proportion of these cells measured at baseline [median V1: 82.8, median V3: 76.6,  $p = 0.0025$ ,  $p = 0.003$ ]. The expression of TIGIT on a per cell basis was also lower after 6-weeks HCQ treatment [MFI: median V1: 3308.5, median B3: 2812.5,  $p = 0.022$ ] (Fig 2C). HCQ treatment also decreased the percentage of the CD29<sup>+</sup> (integrin  $\beta$ 1) Th17 cells (CD4<sup>+</sup>CCR6<sup>+</sup>CD161<sup>+</sup>) [median V1: 91.7, median B3: 89.8,  $p = 0.019$ ]. Finally, the expression of CCR6 on MAIT cells (CD4-CD161++V $\alpha$ 7.2+) [MFI: median V1: 1460, median V3: 1223,  $p = 0.011$ ] and CD25 on Tc17 cells [median V1: 1213.5, median V3: 1190.5,  $p = 0.041$ ] decreased following HCQ treatment compared to baseline (Fig 2C).

### T cell activation following in vitro antigen stimulation

In order to develop long-term immune responses, T cells must be able to generate immune memory and response to antigenic exposure [19–21]. Therefore, the functional capacities of memory T cells after 6-weeks of HCQ treatment were utilized a 12-hour or 7-day stimulation with CEF or HPV peptide pools (see data in Supporting Information). To assess the expression of three activation markers (acute activation marker CD69, the activation and pro-apoptotic marker CD95, and the chronic activation marker HLA-DR). This analysis was carried out on bulk CD4<sup>+</sup> and CD8<sup>+</sup> T cells as well as naïve (CD45RA<sup>+</sup>CCR7<sup>+</sup>), central memory

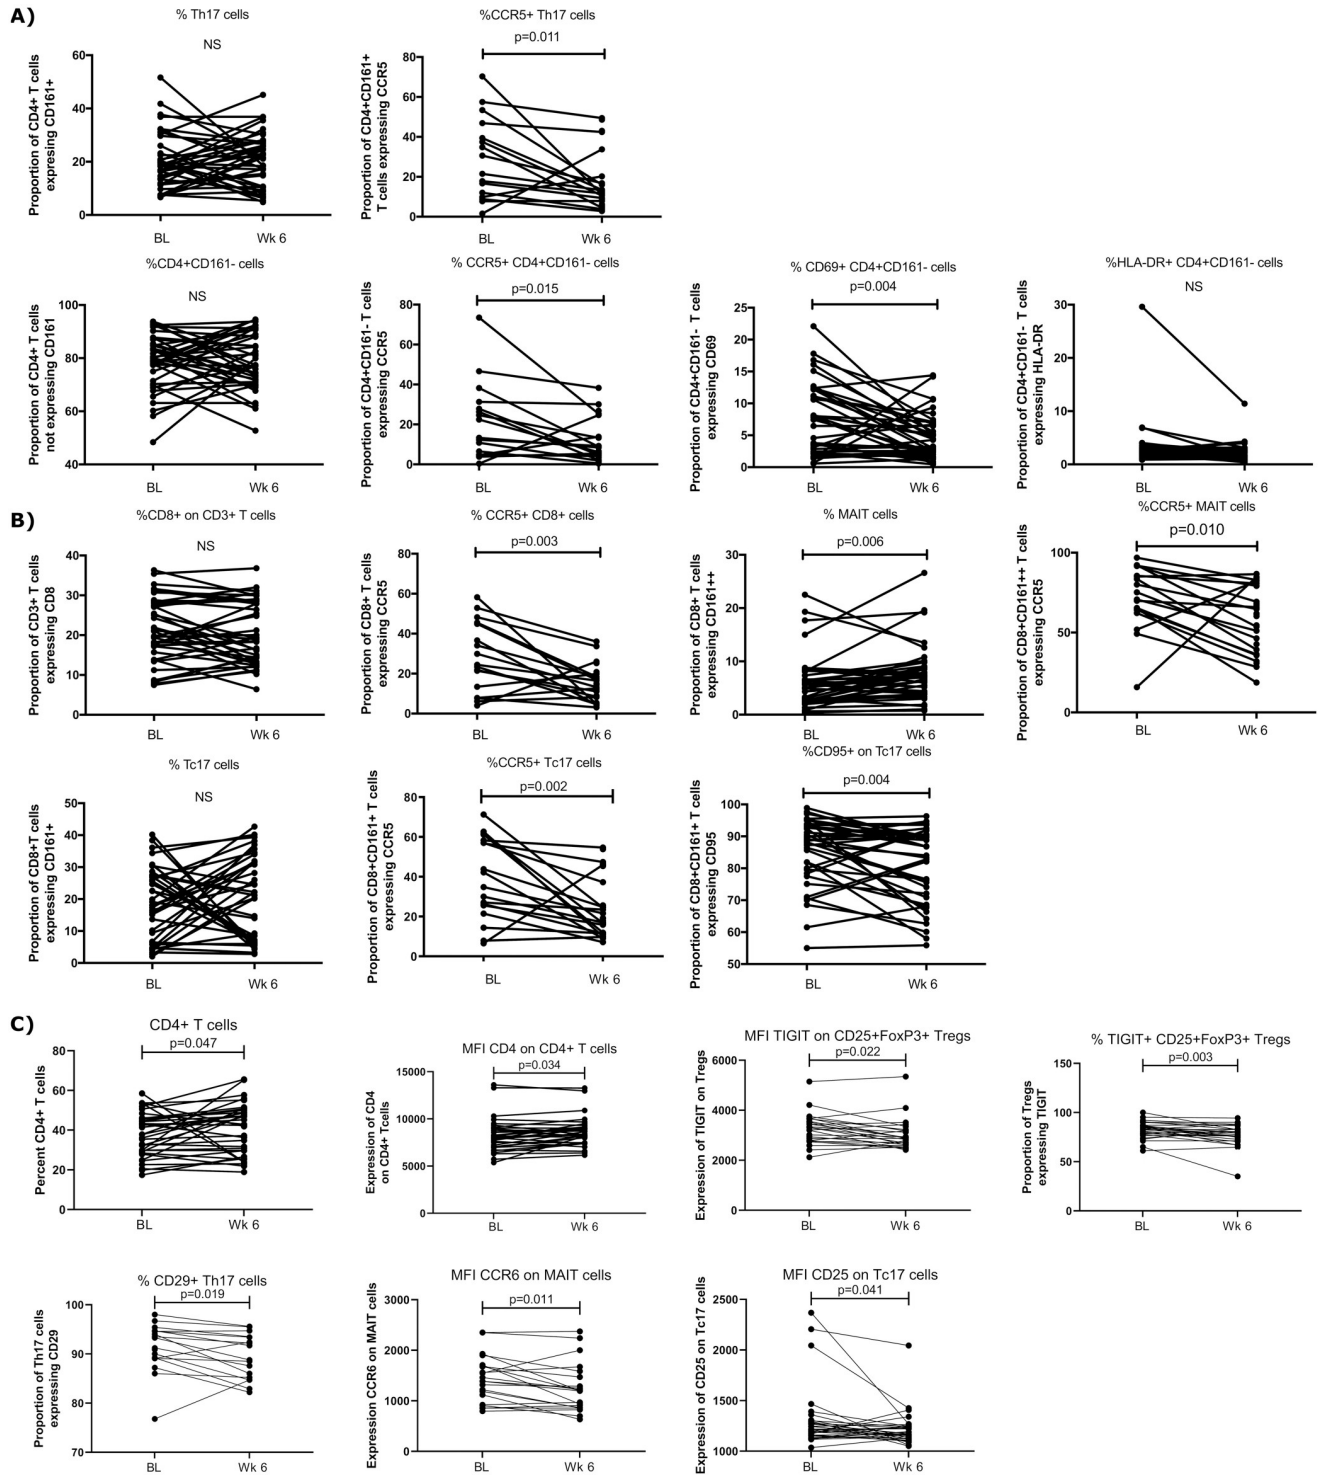

**Fig 2. Effect of HCQ on T cell subsets from *ex vivo* PBMCs.** Data were analyzed using Wilcoxon paired rank test and p values <0.05 were considered significant. A) Changes in the proportion of CD4+ T cells in the fresh blood of participants treated with HCQ for 6-weeks. B) Changes in the proportion of CD8+ T cells in the fresh blood of participants treated with HCQ for 6-weeks. C) Changes in the proportion of T cell markers in the cryopreserved blood of participants treated with HCQ for 6-weeks. T regulatory cells (Tregs), Mucosal associated invariant T cells (MAIT). Data was analyzed using Wilcoxon paired rank test and p values <0.05 were considered significant.

<https://doi.org/10.1371/journal.pone.0287738.g002>



(CD45RA<sup>-</sup>CCR7<sup>+</sup>), and effector memory (CD45RA<sup>-</sup>CCR7<sup>-</sup>) T cells. Only data from responder to the peptide pools are presented in the following sections.

**Twelve-hour stimulation.** In the CD4<sup>+</sup> T cell compartment, following 12-hour stimulation with the CEF peptide pool, there was a decrease in the overall proportion [median V1: 53.8, median V3: 47.5,  $p = 0.035$ ] and expression of CD95 on CD4<sup>+</sup> T cells [median V1: 1439.5, median V3: 1381.5,  $p = 0.001$ ] following HCQ treatment. In the memory cell subsets, we observed a decreased in the expression of CD95 on central memory CD4<sup>+</sup> T cells [MFI median V1: 1568.5, MFI median V3: 1546.5,  $p = 0.015$ ], effector memory CD4<sup>+</sup> T cells [MFI median V1: 1457.5, MFI median V3: 1387.5,  $p = 0.001$ ], and naïve CD4 T cells [MFI median V1: 1434.5, MFI median V3: 1336,  $p = 0.033$ ]. Furthermore, the proportion of CD95+ on naïve CD4<sup>+</sup> T cells decreased post HCQ [median V1: 13.8, median V3: 10.45,  $p = 0.003$ ] (Fig 3A).

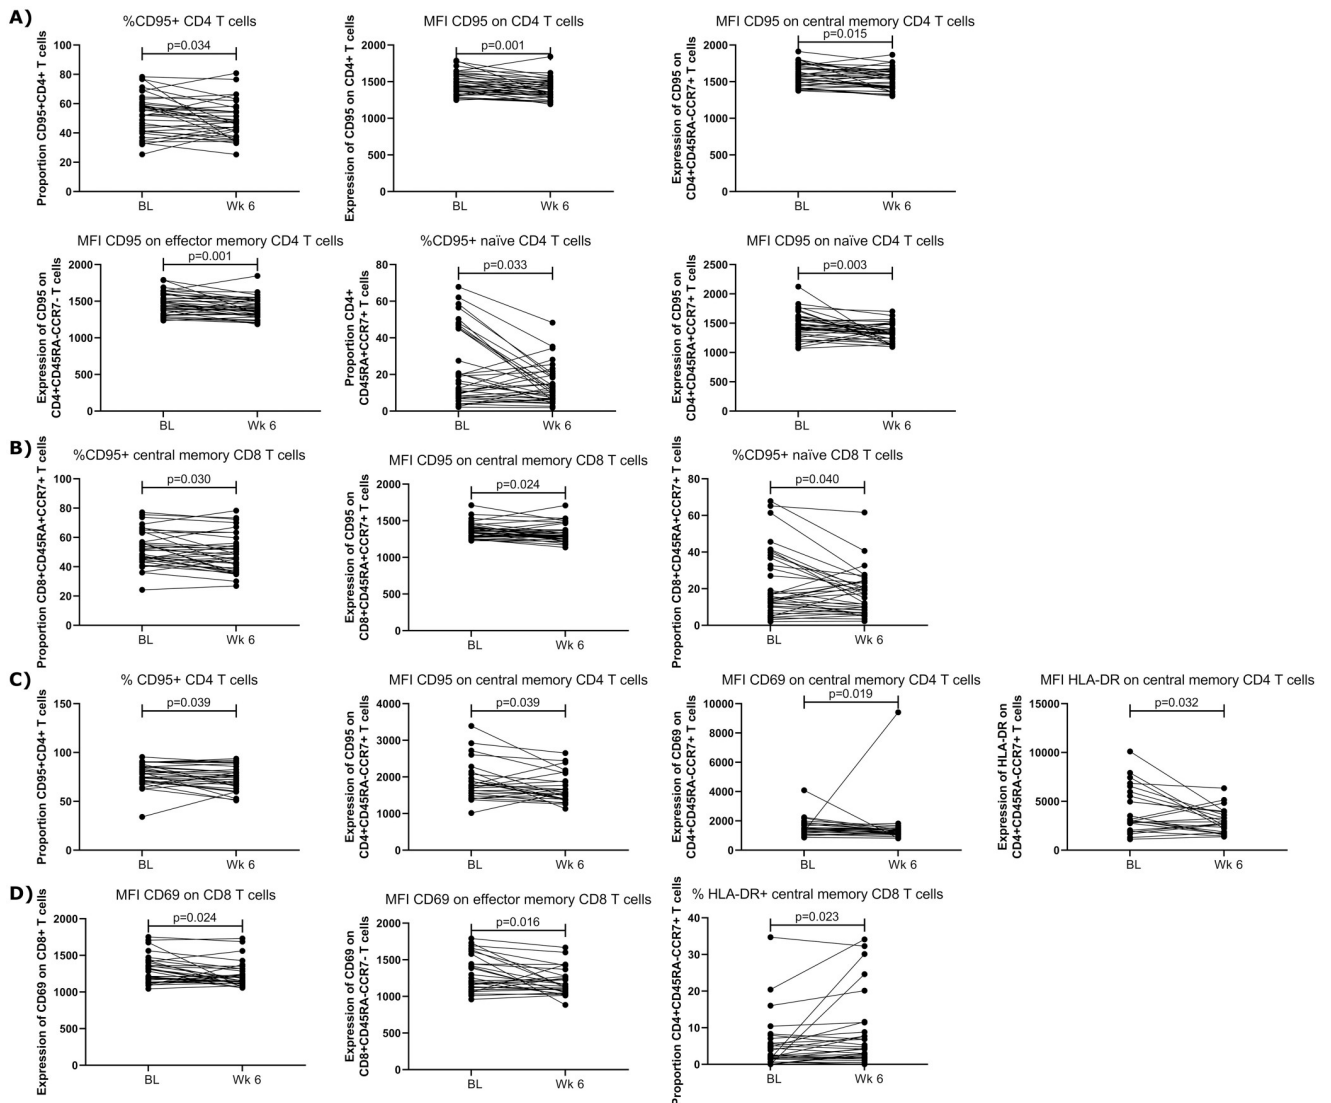

**Fig 3. Effect of HCQ on T cell activation markers post stimulation with 2µg/mL CEF (cytomegalovirus, Epstein Barr virus, and influenza virus) peptide pool.** A) Changes in CD4+ T cell markers following 12-hour stimulation. B) Changes in CD8+ T cell markers following 12-hour stimulation. C) Changes in CD4+ T cell markers following 7-day stimulation. D) Changes in CD8+ T cell markers following 7-day stimulation with CEF. Data was analyzed using Wilcoxon paired rank test and  $p$  values  $<0.05$  were considered significant.

<https://doi.org/10.1371/journal.pone.0287738.g003>

Similar decreases in the expression or proportion of CD95 on CD4<sup>+</sup> T cells were seen following stimulation with the HPV peptide pool (S1A Fig).

In the CD8<sup>+</sup> T cell compartment, following 12-hour CEF peptide pool stimulation, the proportion of central memory CD8<sup>+</sup>CD95<sup>+</sup> T cells [median V1: 51.45, median V3: 47.45,  $p = 0.030$ ] as well as its expression per cell [median V1: 1342, median V3: 1297.5,  $p = 0.024$ ] decreased with HCQ treatment. We also observed an increase in the proportion of naïve CD8<sup>+</sup>CD95<sup>+</sup> T cells [median V1: 15.1, median V3: 16.05,  $p = 0.040$ ] post HCQ (Fig 3B).

**Seven-day stimulation.** In line with the 12-hour assay, following CEF peptide pool stimulation the proportion of CD95 on bulk CD4<sup>+</sup> T cells [median V1: 78.3, median V3: 76,  $p = 0.039$ ] and the expression of CD95 on central memory CD4<sup>+</sup> T cells [median V1: 1786, median V3: 1661,  $p = 0.039$ ] decreased post HCQ. We also observed a decrease in the expression of CD69 [median V1: 1432, median V3: 1299,  $p = 0.019$ ] and HLA-DR [median V1: 3109.5, median V3: 2707.5,  $p = 0.032$ ] on central memory CD4<sup>+</sup> T cells after HCQ treatment (Fig 3C). Similar decreases in HLA-DR were seen in effector memory CD4 T cells following HPV peptide pool stimulation (S1B Fig).

When looking at the impact of CEF stimulation on the CD8<sup>+</sup> T cell compartment, we observed a decrease in the expression of CD69 on bulk CD8<sup>+</sup> T cells [median V1: 1284, median V3: 1188,  $p = 0.024$ ] and on effector memory CD8<sup>+</sup> T cells [median V1: 1213, median V3: 1165,  $p = 0.016$ ] post-HCQ. CEF stimulation also resulted in an increase proportion of HLA-DR on central memory CD8<sup>+</sup> T cells [median V1: 2.29, median V3: 4.195,  $p = 0.023$ ] (Fig 3D). Similar decreases in CD69 were seen in central memory and naïve CD8 T cells following HPV peptide pool stimulation (S1C Fig).

### Impact of HCQ on T cell capacity to produce cytokine after stimulation

Cytokines are the chemical messengers by which immune cells affect their function. Therefore, it is important to assess whether the immune cells capacity to produce cytokines following stimulation is altered by HCQ treatment. The effect of HCQ treatment on cytokine production (IFN $\gamma$ , TNF $\alpha$ , IL-2) was assessed in three ways: the total amount of cells responding to stimulation, the amount of cytokine produced on a per-cell basis, and the ability of cells to co-express the three cytokines.

When determining overall concentration of cytokines produced, we used an adapted version of the background corrected cytokines [19]. Herein, cytokines detected in the unstimulated conditions were subtracted from stimulation conditions (CEF or HPV peptide pools) to allow assessment of the effect of HCQ on cytokine production in responding individuals. Overall, HCQ treatment decreased the amount of cytokine produced. As seen in Fig 4A, following stimulation with the CEF peptide pool, the percent of TNF $\alpha$  decreased in both CD4<sup>+</sup> T cells [median V1: 0.5, median V3: 0.25,  $p = 0.003$ ] and effector memory CD4<sup>+</sup> T cells [median V1: 0.39, median V3: 0.16,  $p = 0.030$ ]. There is also a decrease in the percent of IL-2 produced by naïve CD8<sup>+</sup> T cells following stimulation with the CEF peptide pool [median V1: 0.104, median V3: 0.044,  $p = 0.031$ ] which was also seen with the HPV peptide pool (S2A Fig).

As stated above, the amount of cytokine produced on a per cell basis was also assessed by determining the median fluorescence intensity (MFI) of each cytokine after stimulation. In general, the amount of cytokine produced on a per cell basis was decreased following HCQ treatment. Background IFN $\gamma$  production (unstimulated condition) decreased in bulk CD4<sup>+</sup> T cells [median V1: 2064, median V3: 1886,  $p = 0.0012$ ], central memory CD4<sup>+</sup> T cells [median V1: 2091, median V3: 1879,  $p = 0.0009$ ], naïve CD4<sup>+</sup> T cells [median V1: 2091, median V3: 1989,  $p = 0.0153$ ], and central memory CD8<sup>+</sup> T cells [median V1: 2083.5, median V3: 1953,  $p = 0.0040$ ] (Fig 4B). Stimulation with CEF peptide pool resulted in decreased expression of

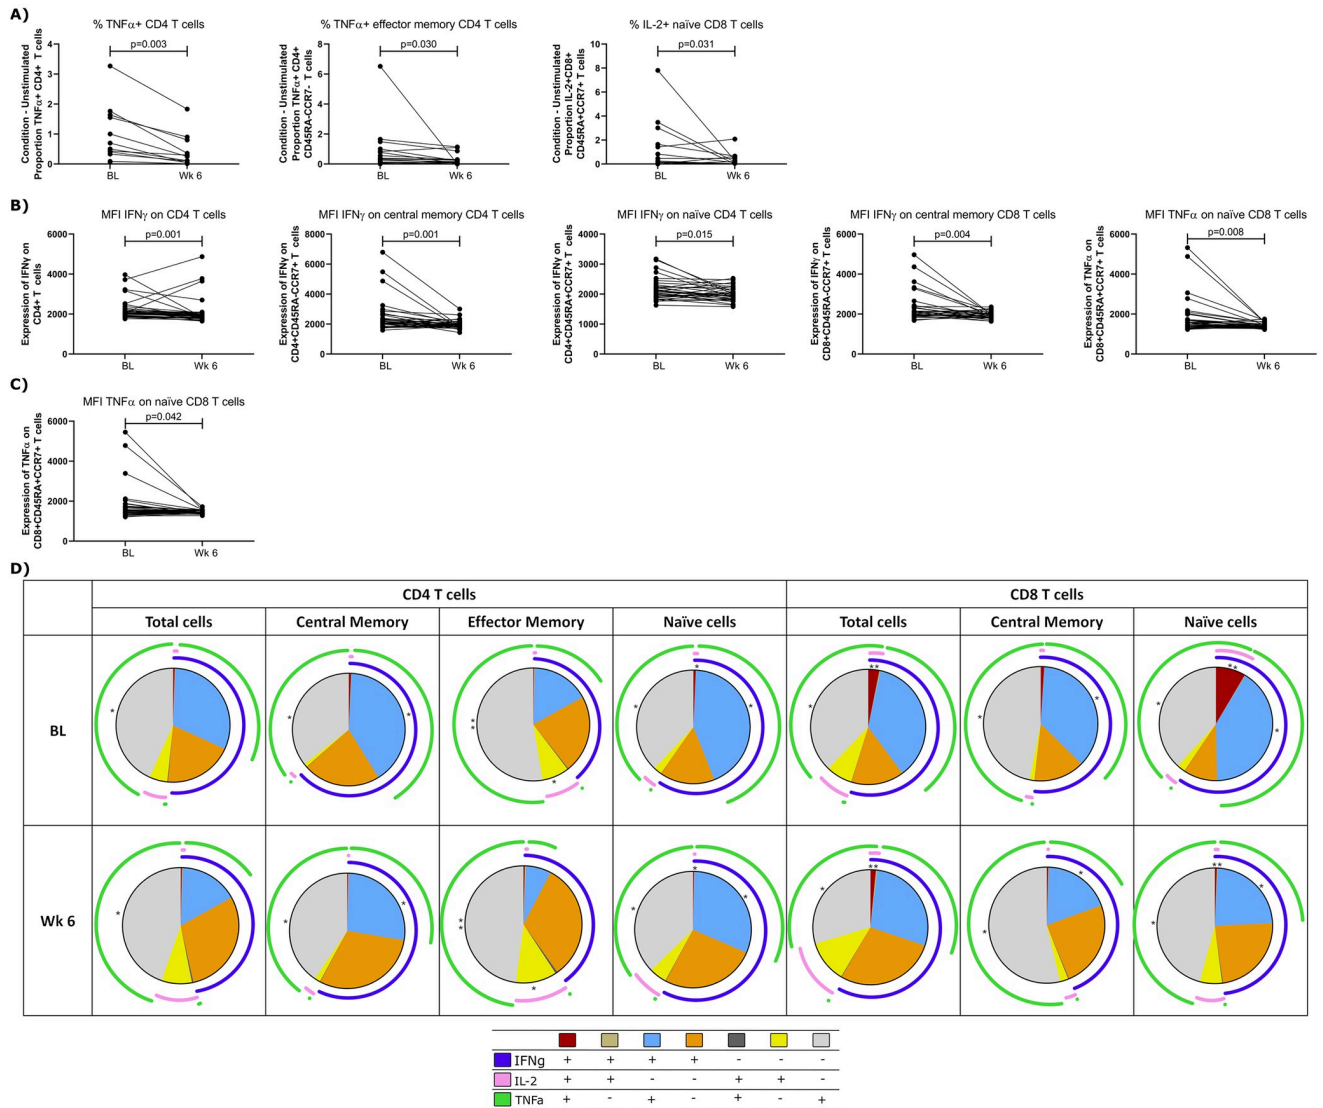

**Fig 4. Effect of HCQ on cytokines after a 12-hour stimulation with 2µg/mL CEF (cytomegalovirus, Epstein Barr virus, and influenza virus) peptide pool.** A) Cytokine production determined by subtracting the amount of cytokine detected in the unstimulated condition from each of the stimulated conditions used in this study, B) Cytokine expression in unstimulated cells, C) cytokine expression following stimulation with the CEF peptide pool. D) Co-expression of multiple cytokines,  $p < 0.05$  (\*),  $p < 0.01$  (\*\*), pie colours represent different co-expression options, arc legend colours indicate the three cytokines assessed. Data was analyzed using Wilcoxon paired rank test and  $p$  values  $< 0.05$  were considered significant.

<https://doi.org/10.1371/journal.pone.0287738.g004>

TNFα on naïve CD8<sup>+</sup> T cells [median V1: 1506, median V3: 1453,  $p = 0.042$ ] (Fig 4C) though it should be noted there was also decrease in TNFα expression in naïve CD8<sup>+</sup> T cells in the absence of stimulation (unstimulated cells) [median V1: 1487, median V3: 1425,  $p = 0.0084$ ] (Fig 4B). Stimulation with the HPV peptide pool resulted in decreases in the expression of cytokines (particularly IFNγ on CD4<sup>+</sup> T cells and TNFα on CD8<sup>+</sup> T cells) following HCQ treatment (S2B Fig).

Finally, the effect of HCQ on the co-expression of IFNγ, TNFα, and IL-2 on T cell subsets was assessed. The Boolean gating option in FlowJo, which allows observation of all combinations of co-expression for chosen markers, was used. Pie charts of median numbers of cells

expressing at least one cytokine to all three cytokines in response to 12-hour stimulation with the CEF pool can be observed in Fig 4D. Following CEF peptide pool stimulation in all T cell subsets, except effector memory CD8<sup>+</sup> T cells, decreases in T cells co-expressing IFN $\gamma$  and TNF $\alpha$  were found with corresponding increases in the number of cells expressing only one of the cytokines. In addition, for total CD8<sup>+</sup> T cells and naïve CD8<sup>+</sup> T cells, there was a significant decrease in the number of cells co-expressing all three cytokines (Fig 4D). Following HPV peptide pool stimulation decreased TNF $\alpha$  and IL-2 co-expression was observed (S2C Fig).

While cytokine responses provides a measure of immediate functional ability in response to an infectious agent, the ability of immune cells to expand and proliferate in response to stimulation is crucial to combating the infection [22]. Therefore, during our 7-day stimulation assay, we assessed the effect of HCQ on the T cell capacity to proliferate. While cellular division occurred, HCQ had little to no effect on the percent of cells able to divide when stimulated with 3 different conditions (CEF, HPV, CD3/CD28 beads) (S3 Fig).

## Discussion

COVID-19 has brought forward many challenges and highlighted that there is still a lack of knowledge regarding how the human immune system responds to viral infection and vaccines. One of these gaps in knowledge is how certain medications may impact the capacity of the immune system to respond to viral infection or vaccines. People suffering from autoimmune diseases like rheumatoid arthritis or systemic lupus erythematosus are often being prescribed HCQ to manage their conditions [7], but little is known about how this impacts their capacity of establishing an immune response to viral infection or vaccines. Based on pilot study results from 2014, in the context of preventing HIV infection in healthy participants, we are reporting herein some of our findings on how HCQ modifies the systemic immune response toward a less activated and less responsive phenotype. This is important as it could impact how people treated with HCQ respond to immune challenges.

With the COVID vaccine roll-out in 2021, we saw an important reduction in SARS-CoV2 infections and infections related-morbidity and mortality [23]. However, with the emergence of new variants, we also observed a decrease in the neutralization capacity of the antibodies produce by the vaccines [24, 25]. Since the start of the pandemic, most of the focus (both for vaccine development and immunity surveillance) has been put toward the capacity of individuals to produce antibodies [26–31]. The decline in antibodies produced in response to infection or vaccine over time was observed at a faster rate in some individuals with immune disorders and could be associated with treatments they were taking [6].

Understanding if a potential treatment can impact the humoral response against the virus is therefore highly relevant. HCQ has been shown to reduce the level of antiphospholipid antibodies [32]. In Sjögren syndrome patients, the use of HCQ decreases the level of IgG and IgM [33]. In our study, we observed that 6-week HCQ treatment significantly decreases the level of total IgG in healthy individuals. This was previously observed in HIV infected individuals who took HCQ [34]. Though our bulk immunoglobulin assay could not indicate which type of IgG was decreased, in a second more specific assay we observed that the level of influenza-specific IgG was not changed by the use of HCQ. This is important because despite an overall decrease in the blood IgG titer, the level of specific viral IgG was not affected. It is encouraging to note that the influenza-specific antibodies did not wane and may suggest that pre-existing antibodies formed prior to HCQ may not be affected. However, the decrease in total IgG levels raises concerns if, for those taking HCQ, their *de novo* responses to newly delivered vaccines would be as effective.

While the presence of antibodies is an important measure of responsiveness to vaccines or infection, such as SARS-CoV-2, there is mounting evidence showing that T cell responses are required for broad and durable protection [19–21]. A study from Grifoni *et al.* showed that circulating SARS-CoV-2 specific CD8<sup>+</sup> and CD4<sup>+</sup> T cells could be observed in 70% and 100%, respectively, of COVID-19 convalescent patients [20]. Furthermore, it was shown that memory T cells against SARS-CoV-1 could be detected 17 years after exposure, which highlights the importance that T cells could have on the duration of protection [35].

T cells play an important role in rheumatoid arthritis pathology. The presence of memory CD4<sup>+</sup> T cells in joints, the frequencies of circulating Th17 and serum levels of IL-17 are associated with disease activity [36–39]. HCQ has been shown to interfere with the intracellular calcium stores required for T cell receptor stimulation resulting in decreased expression of the early activation marker CD69 [40]. It has also been observed that it inhibits CD4<sup>+</sup> T cell activation by AP-1 signaling modulation [41]. Herein, we observed an increase in bulk circulating CD4<sup>+</sup> T cells, as well as, the expression of CD4 receptor per cell after 6-weeks on HCQ treatment compared to baseline. Despite this increase, HCQ treatment led to a decrease in the proportion of CD4<sup>+</sup>CD161<sup>-</sup> expressing CCR5 or CD69, as well as CD8<sup>+</sup>CCR5<sup>+</sup> and CD8<sup>+</sup>CD161<sup>+</sup> expressing CCR5 or CD95. Our results are supported by a study from Goldman *et al.*, showing that HCQ inhibited anti-TCR-induced-up-regulation of CD69 expression of CD4<sup>+</sup> T cells [40]. T cells expressing CCR5 have been suggested to play an important role in the rheumatoid arthritis pathology due to their capacity to migrate to inflamed synovium [42]. The capacity of HCQ treatment to decrease the expression of CCR5 was also observed in a study from Hachim *et al* [43]. Interestingly, CD4<sup>+</sup>CD29<sup>+</sup> T cells have been associated with the persistent inflammation observed in people with ulcerative colitis [44]. In this study, we showed that the proportion of Th17 expressing CD29 was decreased after 6-weeks on HCQ. Th17 are a CD4<sup>+</sup> T cell subset that produce a high quantity of IL-17 [45] and have an important role in inflammatory responses and autoimmune diseases [46]. Together, our data shows that HCQ treatment decreased *ex vivo* T cell activation in our population of healthy donors. While this decrease of T cell activation is beneficial for people suffering from rheumatoid arthritis or systemic lupus erythematosus, it could impact their ability to mount a proper immune response to viral infections or vaccines.

To determine if HCQ treatment affects T cell capacity to respond to recall antigen or to produce cytokines, we stimulated the PBMC of our participants obtained at baseline and after 6-weeks on HCQ with peptide pools to produce a recall antigen response. The results showed that after stimulation (short-term 12-hour or long-term 7-day assays), the expression of CD95 on memory T cells was decreased. After the longer stimulation there was also a decrease in the expression of the early activation marker CD69 on central memory CD4<sup>+</sup> T cells and effector memory CD8<sup>+</sup> T cells. Furthermore, the expression of the chronic activation marker HLA-DR was also affected on central memory (both CD4<sup>+</sup> and CD8<sup>+</sup>) and on effector CD4<sup>+</sup> T cell memory. When looking at T cell capacity to produce cytokines after stimulation of PBMC collected before and after HCQ uptake, we observed that the expression of TNF $\alpha$  from bulk CD4<sup>+</sup> T cells and effector CD4<sup>+</sup> T cells was affected. Indeed, those cell subsets produced less TNF $\alpha$  after 6-weeks on HCQ. The production of TNF $\alpha$  was also affected for CD8<sup>+</sup> naïve T cells. By looking at cytokine expression with Boolean gating, we also observed that the production of cytokines after treatment on HCQ was less diverse. In all the T cell populations studied, the population co-expressing both TNF $\alpha$  and IFN $\gamma$  decreased. These data show that when exposed to previously exposed antigens, the capacity of the T cell memory compartment to get activated to mount an immune response is affected by HCQ treatment.

Our study has some limitations that must be mentioned. The duration of time on HCQ was only 6-weeks which is very short compared to people taking HCQ for treating autoimmune disease. This study was not designed to look at how HCQ impacts the immune response to

SARS-CoV-2 infection or the response to vaccines against COVID-19, as it was conducted in 2014. However, it does offer some insight about how HCQ treatment may result in an altered immune response which may impact responses to respiratory and mucosal viruses. Those changes, which include reductions in T cell memory immune response and a less diverse cytokine production in response to stimulation with respiratory and mucosal recall antigens, may be important factors for *de novo* responses to other infections or vaccines.

## Conclusions

Our findings provide information about the importance of understanding how HCQ treatment affects the immune system. Herein 6-week 200mg/day reduced T cell activation and cytokine production to peptide pools indicating a dampened immune response. This could have implications for people suffering from immune disorders who use HCQ treatment.

## Supporting information

**S1 Fig. Effect of HCQ on T cell activation markers post stimulation with 8 $\mu$ g/mL HPV (human papilloma virus) peptide pool.** A) Changes in CD4+ T cell markers following 12-hour stimulation. B) Changes in CD4+ T cell markers following 7-day stimulation. C) Changes in CD8+ T cell markers following 7-day stimulation. Data was analyzed using Wilcoxon paired rank test and p values <0.05 were considered significant. (TIF)

**S2 Fig. Effect of HCQ on cytokines after a 12-hour stimulation with 8 $\mu$ g/mL HPV (human papilloma virus) peptide pool.** A) Cytokine production determined by subtracting the amount of cytokine detected in the unstimulated condition from each of the stimulated conditions used in this study, B) cytokine expression. C) Co-expression of multiple cytokines, p<0.05 (\*), p<0.01 (\*\*), pie colours represent different co-expression options, arc legend colours indicate the three cytokines assessed. Data was analyzed using Wilcoxon paired rank test and p values <0.05 were considered significant. (TIF)

**S3 Fig. Effect of HCQ on proliferative ability after a 7-day stimulation.** A) Proliferation following stimulation with 2 $\mu$ g/mL CEF (cytomegalovirus, Epstein Barr virus, and influenza virus) peptide pool. B) Proliferation following stimulation with 8 $\mu$ g/mL HPV (human papilloma virus) peptide pool cytokine expression. Data was analyzed using Wilcoxon paired rank test and p values <0.05 were considered significant. (TIF)

## Acknowledgments

The authors thank all the participants of the IIQ study as well as the female sex workers from the Pumwani and Baba Dogo cohort for their support.

## Author Contributions

**Conceptualization:** Julie Lajoie, Keith R. Fowke.

**Formal analysis:** Monika M. Kowatsch, Julie Lajoie.

**Funding acquisition:** Julie Lajoie, Keith R. Fowke.

**Investigation:** Monika M. Kowatsch, Julie Lajoie.

**Methodology:** Monika M. Kowatsch, Julie Lajoie, Lucy Mwangi, Kenneth Omollo, Natasha Hollett.

**Project administration:** Julie Lajoie, Julius Oyugi, Joshua Kimani.

**Visualization:** Monika M. Kowatsch, Julie Lajoie.

**Writing – original draft:** Monika M. Kowatsch, Julie Lajoie.

**Writing – review & editing:** Monika M. Kowatsch, Julie Lajoie, Lucy Mwangi, Kenneth Omollo, Julius Oyugi, Natasha Hollett, Joshua Kimani, Keith R. Fowke.

## References

1. Bertagnolio S, Thwin SS, Silva R, Nagarajan S, Jassat W, Fowler R, et al. Clinical features of, and risk factors for, severe or fatal COVID-19 among people living with HIV admitted to hospital: analysis of data from the WHO Global Clinical Platform of COVID-19. *Lancet HIV* [Internet]. 2022; 9(7):e486–95. Available from: [http://dx.doi.org/10.1016/S2352-3018\(22\)00097-2](http://dx.doi.org/10.1016/S2352-3018(22)00097-2) PMID: 35561704
2. Al GBET, Beltramo G, Cottenet J, Mariet A sophie, Georges M, Piroth L, et al. Chronic respiratory diseases are predictors of severe outcome in COVID-19 hospitalised patients: a nationwide study. *Eur Respir J* [Internet]. 2021; 58:1–10. Available from: <http://dx.doi.org/10.1183/13993003.04474-2020>
3. Gallagher O, Disord C, Gallagher KO, Shek A, Bean DM, Bendayan R, et al. Pre - existing cardiovascular disease rather than cardiovascular risk factors drives mortality in COVID - 19. *BMC Cardiovasc Disord* [Internet]. 2021;1–13. Available from: <https://doi.org/10.1186/s12872-021-02137-9> PMID: 34217220
4. Akiyama S, Hamdeh S, Micic D, Sakuraba A. Prevalence and clinical outcomes of COVID-19 in patients with autoimmune diseases: a systematic review and meta- analysis. *BMJ Autoinflammatory Disord*. 2020;1–8.
5. Sakuraba A, Luna A, Micic D. Serologic Response to Coronavirus Disease 2019 (COVID-19) Vaccination in Patients With Immune-Mediated Inflammatory Diseases: A Systematic Review and Meta-analysis. *Gastroenterology*. 2020; 162(January):88–108.
6. Dayam RM, claude Gingras A, Watts TH. in patients with immune-mediated inflammatory diseases Accelerated waning of immunity to SARS-CoV-2 mRNA vaccines in patients with immune-mediated inflammatory diseases. *JCI insight*. 2022; 7(11). <https://doi.org/10.1172/jci.insight.159721> PMID: 35471956
7. Rainsford KD, Parke AL, Clifford-Rashotte M, Kean WF. Therapy and pharmacological properties of hydroxychloroquine and chloroquine in treatment of systemic lupus erythematosus, rheumatoid arthritis and related diseases. *Inflammopharmacology* [Internet]. 2015 Oct 6 [cited 2015 Oct 7]; 23(5):231–69. Available from: <http://www.ncbi.nlm.nih.gov/pubmed/26246395> <https://doi.org/10.1007/s10787-015-0239-y>
8. Kaplan YC, Ozsarfati J, Nickel C, Koren G. Reproductive outcomes following hydroxychloroquine use for autoimmune diseases: a systematic review and meta-analysis. *Br J Clin Pharmacol* [Internet]. 2016 May [cited 2017 May 17]; 81(5):835–48. Available from: <http://www.ncbi.nlm.nih.gov/pubmed/26700396> <https://doi.org/10.1111/bcp.12872>
9. Boulware D, Pullen M, Bangdiwala K, Pastick S, Lofgren E, Okafor C, et al. A Randomized Trial of Hydroxychloroquine as Postexposure Prophylaxis for Covid-19. *N Engl J Med*. 2020; 383(6):517–25. <https://doi.org/10.1056/NEJMoa2016638> PMID: 32492293
10. Hernandez A V, Roman YM, Pasupuleti V, Barboza JJ, White CM. Hydroxychloroquine or Chloroquine for Treatment or Prophylaxis of COVID-19. *Ann Intern Med*. 2020; 173(4).
11. Kupferschmidt K. Three big studies dim hopes that hydroxychloroquine can treat or prevent COVID-19. *Science* (80-) [Internet]. 2020 Jun 9 [cited 2022 Nov 3]; Available from: <https://www.sciencemag.org/news/2020/06/three-big-studies-dim-hopes-hydroxychloroquine-can-treat-or-prevent-covid-19>
12. Rentsch CT, Devito NJ, Mackenna B, Morton CE, Bhaskaran K, Brown JP, et al. Articles Effect of pre-exposure use of hydroxychloroquine on COVID-19 mortality: a population-based cohort study in patients with rheumatoid arthritis or systemic lupus erythematosus using the OpenSAFELY platform. *Lancet Rheumatol* [Internet]. 2021; 3(1):e19–27. Available from: [http://dx.doi.org/10.1016/S2665-9913\(20\)30378-7](http://dx.doi.org/10.1016/S2665-9913(20)30378-7)
13. Lajoie J, Birse K, Mwangi L, Chen Y, Cheruiyot J, Akolo M, et al. Using safe, affordable and accessible non-steroidal anti-inflammatory drugs to reduce the number of HIV target cells in the blood and at the female genital tract. *J Int AIDS Soc* [Internet]. 2018 Jul [cited 2018 Nov 2]; 21(7):e25150. Available from: <http://www.ncbi.nlm.nih.gov/pubmed/30047573> <https://doi.org/10.1002/jia2.25150>

14. Chen Y, Traore YL, Li A, Fowke KR, Ho EA. Development of polyether urethane intravaginal rings for the sustained delivery of hydroxychloroquine. *Drug Des Devel Ther* [Internet]. 2014 [cited 2017 May 17]; 8:1801–15. Available from: <http://www.ncbi.nlm.nih.gov/pubmed/25336923> <https://doi.org/10.2147/DDDT.S71352>
15. Keynan Y, Bodnarchuk T, Wayne S, Li Y, Fowke KR. Evaluation of influenza-specific humoral response by microbead array analysis. *Can J Infect Dis Med Microbiol* [Internet]. 2011 [cited 2020 Apr 30]; 22(1):25. Available from: <https://www.ncbi.nlm.nih.gov/pmc/articles/PMC3076152/> <https://doi.org/10.1155/2011/202516> PMID: 22379485
16. ThermoFisher Scientific. BestProtocols: Staining Intracellular Antigens for Flow Cytometry—CA [Internet]. ThermoFisher Scientific; [cited 2020 Apr 8]. <https://www.thermofisher.com/ca/en/home/references/protocols/cell-and-tissue-analysis/protocols/staining-intracellular-antigens-flow-cytometry.html>
17. Jacobelli S, Sanaa F, Moyal-Barracco M, Pelisse M, Berville S, Villefroy P, et al. Anti-HPV16 E2 protein T-cell responses and viral control in women with usual vulvar intraepithelial neoplasia and their healthy partners. *PLoS One* [Internet]. 2012 Jan [cited 2015 Nov 20]; 7(5):e36651. Available from: <http://www.pubmedcentral.nih.gov/articlerender.fcgi?artid=3348873&tool=pmcentrez&rendertype=abstract> <https://doi.org/10.1371/journal.pone.0036651> PMID: 22590583
18. Koszinowski UH, Reddehase MJ, Jonjic S. The role of CD4 and CD8 T cells in viral infections [Internet]. *Current Opinion in Immunology*. 1991 [cited 2020 Apr 24]. Available from: <https://pubmed.ncbi.nlm.nih.gov/1684507/> [https://doi.org/10.1016/0952-7915\(91\)90005-1](https://doi.org/10.1016/0952-7915(91)90005-1) PMID: 1684507
19. Pulliam JRC, van Schalkwyk C, Govender N, von Gottberg A, Cohen C, Groome MJ, et al. Increased risk of SARS-CoV-2 reinfection associated with emergence of Omicron in South Africa. *Science* (80-) [Internet]. 2022 May 6 [cited 2022 Oct 26]; 376(6593). Available from: <https://www.science.org/doi/10.1126/science.abn4947> PMID: 35289632
20. Grifoni A, Weiskopf D, Ramirez SI, Mateus J, Dan JM, Moderbacher CR, et al. Targets of T Cell Responses to SARS-CoV-2 Coronavirus in Humans with COVID-19 Disease and Unexposed Individuals. *Cell* [Internet]. 2020 Jun 25 [cited 2022 Oct 26]; 181(7):1489–1501.e15. Available from: <http://www.ncbi.nlm.nih.gov/pubmed/32473127> <https://doi.org/10.1016/j.cell.2020.05.015>
21. Feng C, Shi J, Fan Q, Wang Y, Huang H, Chen F, et al. Protective humoral and cellular immune responses to SARS-CoV-2 persist up to 1 year after recovery. *Nat Commun* [Internet]. 2021 Dec 17 [cited 2022 Nov 3]; 12(1):4984. Available from: <https://www.nature.com/articles/s41467-021-25312-0> <https://doi.org/10.1038/s41467-021-25312-0> PMID: 34404803
22. Chaplin DD. 1. Overview of the human immune response. *J Allergy Clin Immunol* [Internet]. 2006 [cited 2019 Jul 29]; 117(2). Available from: <https://pdf.sciencedirectassets.com/272425/1-s2.0-S0091674906X04207/1-s2.0-S0091674905021202/main.pdf?X-Amz-Security-Token=AgoJb3JpZ2luX2VjEAAaCXVzLWVhc3QtMSJHMEUCIQDMOoyJjXbgfbRldt705keYSlp1KebMpTaqkQraAuJmQlgGv%2B0LfPrbhSVnZ13swfAqwp%2BTxSD5j%2FpZsEvP> <https://doi.org/10.1016/j.jaci.2005.09.034> PMID: 16455341
23. Watson OJ, Barnsley G, Toor J, Hogan AB, Winskill P, Ghani AC. Global impact of the first year of COVID-19 vaccination: a mathematical modelling study. *Lancet Infect Dis* [Internet]. 2022 Sep 1 [cited 2022 Nov 3]; 22(9):1293–302. Available from: <http://www.ncbi.nlm.nih.gov/pubmed/35753318> [https://doi.org/10.1016/S1473-3099\(22\)00320-6](https://doi.org/10.1016/S1473-3099(22)00320-6)
24. Lassaunière R, Polacek C, Frische A, Boding L, Sækmoose SG, Rasmussen M, et al. Neutralizing Antibodies Against the SARS-CoV-2 Omicron Variant (BA.1) 1 to 18 Weeks After the Second and Third Doses of the BNT162b2 mRNA Vaccine. *JAMA Netw open* [Internet]. 2022 [cited 2022 Oct 26]; 5(5):e2212073. Available from: <http://www.ncbi.nlm.nih.gov/pubmed/35560054> <https://doi.org/10.1001/jamanetworkopen.2022.12073>
25. Cheng SMS, Mok CKP, Leung YWY, Ng SS, Chan KCK, Ko FW, et al. Neutralizing antibodies against the SARS-CoV-2 Omicron variant BA.1 following homologous and heterologous CoronaVac or BNT162b2 vaccination. *Nat Med* [Internet]. 2022 Mar 20 [cited 2022 Oct 26]; 28(3):486–9. Available from: <https://www.nature.com/articles/s41591-022-01704-7> <https://doi.org/10.1038/s41591-022-01704-7> PMID: 35051989
26. Gobbi F, Buonfrate D, Moro L, Rodari P, Piubelli C, Caldrelli S, et al. Antibody Response to the BNT162b2 mRNA COVID-19 Vaccine in Subjects with Prior SARS-CoV-2 Infection. *Viruses* [Internet]. 2021 Mar 5 [cited 2022 Oct 26]; 13(3):422. Available from: <https://www.mdpi.com/1999-4915/13/3/422> <https://doi.org/10.3390/v13030422> PMID: 33807957
27. Prabhu M, Murphy EA, Sukhu AC, Yee J, Singh S, Eng D, et al. Antibody Response to Coronavirus Disease 2019 (COVID-19) Messenger RNA Vaccination in Pregnant Women and Transplacental Passage Into Cord Blood. *Obstet Gynecol* [Internet]. 2021 [cited 2022 Oct 26]; 138(2):278–80. Available from: <http://www.ncbi.nlm.nih.gov/pubmed/33910219> <https://doi.org/10.1097/AOG.0000000000004438>



28. Jackson LA, Anderson EJ, Roupael NG, Roberts PC, Makhene M, Coler RN, et al. An mRNA Vaccine against SARS-CoV-2—Preliminary Report. *N Engl J Med* [Internet]. 2020 Nov 12 [cited 2022 Oct 26]; 383(20):1920–31. Available from: <http://www.nejm.org/doi/10.1056/NEJMoa2022483> <https://doi.org/10.1056/NEJMoa2022483> PMID: 32663912
29. Xiang F, Wang X, He X, Peng Z, Yang B, Zhang J, et al. Antibody Detection and Dynamic Characteristics in Patients With Coronavirus Disease 2019. *Clin Infect Dis* [Internet]. 2020 [cited 2022 Oct 26]; 71(8):1930–4. Available from: <http://www.ncbi.nlm.nih.gov/pubmed/32306047> <https://doi.org/10.1093/cid/ciaa461>
30. Long QX, Liu BZ, Deng HJ, Wu GC, Deng K, Chen YK, et al. Antibody responses to SARS-CoV-2 in patients with COVID-19. *Nat Med* [Internet]. 2020 Jun 29 [cited 2022 Oct 26]; 26(6):845–8. Available from: <http://www.nature.com/articles/s41591-020-0897-1> <https://doi.org/10.1038/s41591-020-0897-1> PMID: 32350462
31. Zhao J, Yuan Q, Wang H, Liu W, Liao X, Su Y, et al. Antibody Responses to SARS-CoV-2 in Patients With Novel Coronavirus Disease 2019. *Clin Infect Dis* [Internet]. 2020 [cited 2022 Oct 26]; 71(16):2027–34. Available from: <http://www.ncbi.nlm.nih.gov/pubmed/32221519> <https://doi.org/10.1093/cid/ciaa344>
32. Nuri E, Taraborelli M, Andreoli L, Tonello M, Gerosa M, Calligaro A, et al. Long-term use of hydroxychloroquine reduces antiphospholipid antibodies levels in patients with primary antiphospholipid syndrome. *Immunol Res*. 2017; 65(1):17–24. <https://doi.org/10.1007/s12026-016-8812-z> PMID: 27406736
33. Bodewes ILA, Gottenberg JE, Van Helden-Meeuwsen CG, Mariette X, Versnel MA. Hydroxychloroquine treatment downregulates systemic interferon activation in primary Sjögren's syndrome in the JOQUER randomized trial. Available from: <https://academic.oup.com/rheumatology/article/59/1/107/5523045>
34. Piconi S, Parisotto S, Rizzardini G, Passerini S, Terzi R, Argentero B, et al. Hydroxychloroquine drastically reduces immune activation in HIV-infected, antiretroviral therapy-treated immunologic nonresponders. *Blood* [Internet]. 2011 [cited 2017 May 24]; 118(12). Available from: <http://www.bloodjournal.org/content/118/12/3263.long> <https://doi.org/10.1182/blood-2011-01-329060> PMID: 21576701
35. Le Bert N, Tan AT, Kunasegaran K, Tham CYL, Hafezi M, Chia A, et al. SARS-CoV-2-specific T cell immunity in cases of COVID-19 and SARS, and uninfected controls. *Nature* [Internet]. 2020 Aug 20 [cited 2022 Oct 26]; 584(7821):457–62. Available from: <http://www.nature.com/articles/s41586-020-2550-z> <https://doi.org/10.1038/s41586-020-2550-z> PMID: 32668444
36. Basdeo SA, Moran B, Cluxton D, Canavan M, McCormick J, Connolly M, et al. Polyfunctional, Pathogenic CD161+ Th17 Lineage Cells Are Resistant to Regulatory T Cell-Mediated Suppression in the Context of Autoimmunity. *J Immunol* [Internet]. 2015 Jul 15 [cited 2022 Oct 26]; 195(2):528–40. Available from: <http://www.ncbi.nlm.nih.gov/pubmed/26062995> <https://doi.org/10.4049/jimmunol.1402990>
37. Paulissen SMJ, van Hamburg JP, Dankers W, Lubberts E. The role and modulation of CCR6+ Th17 cell populations in rheumatoid arthritis. *Cytokine* [Internet]. 2015; 74(1):43–53. Available from: <http://dx.doi.org/10.1016/j.cyto.2015.02.002> PMID: 25828206
38. Ju JH, Heo YJ, Cho ML, Jhun JY, Park JS, Lee SY, et al. Modulation of STAT-3 in Rheumatoid Synovial T Cells Suppresses Th17 Differentiation and Increases the Proportion of Treg Cells. *ARTHRITIS Rheum* [Internet]. 2012; 64(11):3543–52. Available from: <https://onlinelibrary.wiley.com/doi/10.1002/art.34601> PMID: 22736176
39. Thomas R, McIlraith M, Davis LS, Lipsky PE. RHEUMATOID SYNOVIUM IS ENRICHED IN CD45RBdim MATURE MEMORY T CELLS THAT ARE POTENT HELPERS FOR B CELL DIFFERENTIATION. *Arthritis Rheum* [Internet]. 1992; 35(12):1455–65. Available from: <https://onlinelibrary.wiley.com/doi/10.1002/art.1780351209> PMID: 1472123
40. Goldman FD, Gilman AL, Hollenback C, Kato RM, Premack BA, Rawlings DJ. Hydroxychloroquine inhibits calcium signals in T cells: A new mechanism to explain its immunomodulatory properties. *Blood* [Internet]. 2000 [cited 2017 May 24]; 95(11):3460–6. Available from: <http://www.bloodjournal.org/content/95/11/3460.long?ssoc-checked=true> PMID: 10828029
41. Schmidt RLJ, Jutz S, Goldhahn K, Witzeneder N, Gerner MC, Trapin D, et al. Chloroquine inhibits human CD4+ T-cell activation by AP-1 signaling modulation. *Sci Rep*. 2017; 7:1–14.
42. Patel DD, Zachariah JP, Whichard LP. CXCR3 and CCR5 ligands in rheumatoid arthritis synovium. *Clin Immunol*. 2001; 98(1):39–45. <https://doi.org/10.1006/clim.2000.4957> PMID: 11141325
43. Hachim MY, Hachim IY, Naeem K Bin, Hannawi H, Al Salmi I, Hannawi S. C-C chemokine receptor type 5 links COVID-19, rheumatoid arthritis, and Hydroxychloroquine: in silico analysis. *Transl Med Commun* [Internet]. 2020 Dec 9 [cited 2022 Oct 26]; 5(1):14. Available from: <https://transmedcomms.biomedcentral.com/articles/10.1186/s41231-020-00066-x> <https://doi.org/10.1186/s41231-020-00066-x> PMID: 32923679

44. Zhu Y, Feng Y, Liu H, Ye H, Guo C, Feng J, et al. CD4+CD29+T cells are blamed for the persistent inflammatory response in ulcerative colitis. *Int J Clin Exp Pathol* [Internet]. 2015 [cited 2016 Oct 14]; 8(3):2627–37. Available from: <http://www.ncbi.nlm.nih.gov/pubmed/26045768>
45. Liang SC, Long AJ, Bennett F, Whitters MJ, Karim R, Collins M, et al. An IL-17F/A heterodimer protein is produced by mouse Th17 cells and induces airway neutrophil recruitment. *J Immunol* [Internet]. 2007 Dec 1 [cited 2022 Oct 26]; 179(11):7791–9. Available from: <http://www.ncbi.nlm.nih.gov/pubmed/18025225> <https://doi.org/10.4049/jimmunol.179.11.7791>
46. Maeda Id S, Osaga S, Maeda T, Takeda N, Tamechika SY, Naniwa T, et al. Circulating Th17.1 cells as candidate for the prediction of therapeutic response to abatacept in patients with rheumatoid arthritis: An exploratory research. 2019; Available from: <https://doi.org/10.1371/journal.pone.0215192> PMID: 31747403
